# Supplementary material for: Assessing the capacity of primary health care facilities in Nigeria to deliver eye health promotion: Results of a mixed-methods feasibility study
Source: PLOS Glob Public Health. 2022 Nov 11;2(11):e0000645. doi: 10.1371/journal.pgph.0000645 (PMC10022001; doi:10.1371/journal.pgph.0000645)
Supplement: S1 Data — (XLSX) [file pgph.0000645.s001.xlsx]

## Sheet: JCHEWQ
	JCHEW Questionnaire							1	Study No
2	District/LGA	1	2	3	4	5	6	3	Facility ID
										5	Facility catchment pop
4	Name of Ward/Village
6	Name of facility									8	Type of facility
7	Health worker interviewed	1	VHW								9	1	Health Centre
		2	JCHEW									2	Health post
		3	Head of Facility
		4	JCEW acting as head of facility
10	Age			yrs						11	Sex	1	Male
												2	Female
12	Live in this community	1	Yes							13	Years lived in community
		0	No
14	Completed Sch of Tech	1	Yes							15	Years as JCHEW
		0	No
	General services
16	Which of the following services are provided in this facility
		Yes		No
		1		0	Antenatal care
		1		0	Deliveries
		1		0	Postnatal care
		1		0	Child health
		1		0	Diabetes care
		1		0	Care of the elderly
	Health Promotion in the community
17	Who conducts health promotion activities in this community?
		Yes		No			18	How often do VHWs undertake these activities?
		1		0	Village Health Workers							1	Daily
		1		0	JCHEWs							2	Weekly
		1		0	CHEWs							3	Monthly
		1		0	Community leaders							4	Irregularly
		1		0	Other sp							5	Other sp.
19	How many VHWs do you work with in the community?
20	How many are active in terms of health promotion in the community?
21	In your opinion, how skilled are the VHWs in communicating health promotion to the community?
		1	Very skilled
		2	Some skills
		3	Poor skills
		4	Unskilled
		5	Cannot comment
22	How well do you know this community?								23	Are you fluent in the local language?
		1	Very well								1	Yes
		2	Moderately well								2	No
		3	Not very well
24	About how much of your time do you spend on each of the following groups in the community?
		A lot		Some		A little		None
		3		2		1		0	Antenatal care
		3		2		1		0	Postpartum women
		3		2		1		0	Children 0-5 years
		3		2		1		0	Adolescents
		3		2		1		0	Diabetics
		3		2		1		0	Elderly
		3		2		1		0	All ages
		3		2		1		0	Other sp.
25	Do you carry out any health promotion activities in schools?
		1	Yes
		0	No
26	What type of transport is available for you to visit communities for health promotion?
		0	None
		1	Bicycle
		2	Motorbke
		3	Car/bus
		4	Other sp.
27	Are some communities hard to reach?
		1	Yes
		2	No
28	Do your health promotion activities in the community include promoting the following
		Yes		No
		1		0	Eye health
		1		0	Vitamin A supplementation of pregnant women
		1		0	Exclusive breast feeding of infants (0-12 months)
		1		0	Vitamin A supplementation of young children
	total score	1		0	Measles immunization
		1		0	Child nutrition
		1		0	Diabetes prevention
		1		0	Care of the elderly
		1		0	Safe water
		1		0	Safe sanitation
		1		0	Household waste disposal
		1		0	Supervising VHWs
29	What health promotion materials are available for use in the community?
		Yes		No
		1		0	Posters
		1		0	Fliers
		1		0	Flip charts
		1		0	None
		1		0	Other sp.
30	How easy is it to get health promotion materials for the community?
		1	Easy
		2	Fairly easy
		3	A bit difficult
		4	Unavailable
31	Have you been instructed on how to dispose of old health promotion materials?
		0	No
		1	Yes
		2	Other sp.
32	How do you disemminate health promotion messages to community members?
		Yes		No
		1		0	Home visits
		1		0	Community meetings with target population
		1		0	Community leaders
		1		0	Town Criers
		1		0	Other sp.
	Supervision of health promotion in the community
33	Are health promotion activities undertaken by staff in this faciltiy supervised?
		Yes		No		If no, go to section on reporting
		1		0
34	How often are your health promotion activities in the community supervised by the head of facility?
		1	Weekly
		2	Monthly
		3	Quartlerly
		4	Irregularly
		5	Never/very rare
35	How often are do you supervise the HP activities of VHWs?
		1	Weekly
		2	Monthly
		3	Quartlerly
		4	Irregularly
		5	Never/very rare
36	Do you supervise health promotion activities with the following groups?
		Yes		No
		1		0	Antenatal care
		1		0	Postpartum women
		1		0	Children 0-5 years
		1		0	Adolescents
		1		0	Diabetics
		1		0	Elderly
		1		0	All ages
		1		0	Other sp.
37	Do you have a check list which you use during supervision?
		1	Yes
		2	No
38	Which of the following do you include in supervision of VHWs?
		1		0	Observation of interactions with the community
		1		0	Teaching
		1		0	Referral mechanisms
		1		0	Other, sp
	Reporting by VHWs
39	Do the VHWs report their activities to you?					40	If yes, how frequenty do they report?
		1	Yes							1	Daily
		0	No							2	Weekly
										3	Monthly
										4	Irregularly
	Health Promotion in the facility
41	Does health promotion take place in this facility
		1	Yes
		0	No
42	If yes, what methods of health promotion take place in this facility?
		Yes			No
		1			0	Health talks to groups of patients
		1			0	Counselling one on one
		1			0	Posters
		1			0	Leaflets/fliers
43	Is there an agreed timetable of topics to be covered
		Yes			No
		1			0
44	About how much of your time do you spend on health promotion for each of these groups in this facility?
		A lot		Some		A little		None
		3		2		1		0	Antenatal care
		3		2		1		0	Postpartum women
		3		2		1		0	Children 0-5 years
		3		2		1		0	Adolescents
		3		2		1		0	Diabetics
		3		2		1		0	Elderly
		3		2		1		0	All ages
		3		2		1		0	Other sp.
45	What topics are covered in the health promotion in the facility?
		Yes		No
		1		0	Vitamin A supplementation of pregnant women
		1		0	Exclusive breast feeding of infants (0-12 months)
		1		0	Vitamin A supplementation of young children
		1		0	Measles immunization
		1		0	Child nutrition
		1		0	Diabetes prevention
		1		0	Care of the elderly
		1		0	Use of seat belts
46	Which of the following specific activities take place in this facility
		Yes		No
		1		0	Vitamin A supplementaiton of pregnant women
		1		0	Cleaning the eyes and instilling ointment after birth
		1		0	Rubella immunization
		1		0	Measles immunization
		1		0	Vitamin A supplementation of young chidren
		1		0	Blood sugar testing
		1		0	Blood pressure measurement
	Referrals from VHWs
47	Is there a referral system from the community (VHWs) to the facility?								1	Yes
									2	No
48	If yes, how are patients referred								1	Verbally
									2	Referral slip
									3	Telephone call
									4	SMS
49	Do you give feedback on referrals to the VHWs?								1	Always
									2	Sometimes
									3	Never
	Eye Health promotion
50	Do you do any health promotion specifically for eye health?								1	Yes, in the community
									2	Yes, in the health facility
									3	Yes, in both
									0	No
							Yes		No
51	If yes, what topics are covered						1		0	Poor near vision needs reading glasses
							1		0	Diabetics need yearly eye examination
							1		0	Other, specify
52	How confident are you about delivering health promotion for Eye Health?								1	Very confident
									2	A little confident
									3	Not confident at all
									4	I don’t know
53	How willing would you be to deliver eye health promotion in this facility after training?								1	Very willing
									2	Willing
									3	Reluctant
									4	Not at all
	Detecting and managing eye conditions
54	How confident are you about identifying eye problems?								1	Very confident
									2	A little confident
									3	Not confident at all
									4	I don’t know
55	How confident are you about managing eye problems?								1	Very confident
									2	A little confident
									3	Not confident at all
									4	I don’t know
56	Are staff available who can remove a foreign body from the eye?								1	Always
									2	Sometimes
									3	Never
									4	I don’t know
57	Are staff available who can irrigate the eye?								1	Always
									2	Sometimes
									3	Never
									4	I don’t know
58	Have you received any training in eye conditions?								1	Yes
									2	No
59	How confident are you in knowing which eye conditions								1	Very confident
	need urgent referral								2	A little confident
									3	Not confident at all
									4	I don’t know
60	How many people with eye conditions have you referred to the PHC in the last month?								1	None
									2	1 to 2
									3	>2 to 5
									4	>5
									5	I don’t know
61	What is your perception about undergoing training for eye care?								1	Welcome it and do the training
									2	Welcome it but no time for training
									3	Health workers are already overburdened
									4	Other
	Thank you for your time

## Sheet: JCHEWCL
	Check list for JCHEWs questionnaire											1	Study No
2	District/LGA	1	2	3	4	5	6					3	Facility ID
4	Name of Ward/Village
5	Name of facility
																Check list
1	List of VHWs employed by the facility
2	Health promotion materials available - for the community
3	Health promotion materials available - for the facility
4	Check list of areas covered when JCHEWs supervise VHWs
5	List of topics covered in health talks in the facility
6	Referrals from VHW to the facility - register / referral slips
	Staffing
6	List of VHWs attached to this facility
		2	Observed
		1	Reported, not seen
		0	Not available
	HP materials for the community
	Types of material for different target groups in the community
7		Pregnant women			Postp. women			Children 0-5 yrs			Adolescents			Diabetics			Elderly			All ages			Other sp.
	Poster
	Leaflet/flyer
	Flip-chart
	None
	Others
8	Topics covered by health promotion materials
		Yes		No
		1		0	Eye health
		1		0	Vitamin A supplementation of pregnant women
		1		0	Exclusive breast feeding of infants (0-12 months)
		1		0	Vitamin A supplementation of young children
		1		0	Measles immunization
		1		0	Child nutrition
		1		0	Diabetes prevention
		1		0	Care of the elderly
		1		0	Use of seat belts
9	Language of materials	0	Local language
		1	English
		2	Both
		3	Other sp.
	Quality of materials
10		Yes		No
		1		0	Durable
		1		0	Good graphics/self explanatory for non literate
		1		0	Vernacular
		1		0	Easy to maintain
		1		0	Logos of authorities who issued materials
	Supervision of VHWs by JCHEW
11	Do the VHWs report whether they have delivered health promotion to the following groups
		Recorded			Reported, not seen			Not available
		2			1			0	Antenatal care
		2			1			0	Postpartum women
		2			1			0	Children 0-5 years
		2			1			0	Adolescents
		2			1			0	Diabetics
		2			1			0	Elderly
		2			1			0	All ages
		2			1			0	Other sp.
12	What mode of transport is available for you to travel around the community during supervision?
		1	Foot				13	Are some communities hard to reach?
		2	Bicycle					1	Yes
		3	Motor bike					2	No
		4	Other
	Health promotion in the facility
14	Type of health promotion materials for different target groups in the health facility
		Pregnant women			Postp. women			Children 0-5 yrs			Adolescents			Diabetics			Elderly			All ages			Other sp.
	Poster
	Leaflet/flyer
	Flip-chart
	None
	Others
15	Health talks: register/schedule available
		1	Yes
		0	No
16	If yes, topics:	Yes		No
		1		0	Eye health
		1		0	Vitamin A supplementation of pregnant women
		1		0	Exclusive breast feeding of infants (0-12 months)
		1		0	Vitamin A supplementation of young children
		1		0	Measles immunization
		1		0	Child nutrition
		1		0	Diabetes prevention
		1		0	Care of the elderly
		1		0	Use of seat belts
17	Language of health Promotion materials in
		0	Local language
		1	English
		2	Both
		3	Other sp.
18	Quality of health promotion materials for the community
		Yes		No
		1		0	Durable
		1		0	Good graphics/self explanatory for non literate
		1		0	Vernacular
		1		0	Easy to maintain
		1		0	Logos of authorities who issued materials
19	Referrals from VHWs to facility
		Observed			Reported, not seen			Not available
		2			1			0	Referral Register
		2			1			0	Referral slips
		2			1			0	Evidence of feedback to VHWs
