# Supplementary material for: Assessing the capacity of primary health care facilities in Nigeria to deliver eye health promotion: Results of a mixed-methods feasibility study
Source: PLOS Glob Public Health. 2022 Nov 11;2(11):e0000645. doi: 10.1371/journal.pgph.0000645 (PMC10022001; doi:10.1371/journal.pgph.0000645)
Supplement: S3 Data — (XLSX) [file pgph.0000645.s003.xlsx]

## Sheet: Sheet1
	Village Health Worker Questionnaire								2	Study No VHW /
1	District/LGA	1	2	3	4	5	6			3	Facility ID
4	Name of Ward/Village						5	PHC attached to
6	Type of Facility	1	PHC			7	Cadre Interviewed				1	VHW
		2	Health Post								2	JCHEW
											3	Head of Facility
8	No of villages covered										4	JCHEW acting up
	Demographics
9	Age in years								10	Sex	1	Male
											2	Female
11	Do you live in the community where you practice health promotion?
		1	Yes						12	If yes, years lived in the community
		2	No
13	Years lived in community								14	Years primary school education
15	Years practising as VHW
16	How well do you know this community?								17	Are you fluent in the local language?
		1	Very well								1	Yes
		2	Moderately well								2	No
		3	Not very well
18	How often do you carry out health promotion activities in this community?
		1	Daily
		2	Weekly
		3	Monthly
		4	Irregularly
		5	Other sp.
19	How do you travel around the community?						20	Are some communities inaccessible by road?
		1	By foot								1	Yes
		2	Bicycle								2	No
		3	Motor bike
		4	Other
21	What health promotion materials are available for use in the community?
		Yes		No
		1		0	Posters
		1		0	Fliers
		1		0	Flip charts
		1		0	None
		1		0	Other sp.
22	Materials available for different groups
		Pregnant women		Postpartum w		Kids 0-5 years		Adolescents		Diabetics		Elderly		All ages		Other sp.
23	What language are your health promotion materials in?
		1	Local language
		2	English
		3	Both
		4	Other sp.
24	How easy is it to get health promotion materials for the community?
		1	Easy
		2	Fairly easy
		3	A bit difficult
		4	Unavailable
25	How easy is it to maintain your health promotion materials?
		1	Very easy
		2	Fairly easy
		3	Difficult
26	Have you been instructed on how to dispose of old health promotion materials?
		0	No
		1	Yes
		2	Other sp.
27	How do you disemminate information to community members?
		Yes		No
		1		0	Home visits
		1		0	Community meetings with target population
		1		0	Community leaders
		1		0	Town Criers
		1		0	Other sp.
28	About how much of your time do you spend on each of these groups in this community?
		A lot		Some		A little		None
		3		2		1		0	Antenatal care
		3		2		1		0	Postpartum women
		3		2		1		0	Children 0-5 years
		3		2		1		0	Adolescents
		3		2		1		0	Diabetics
		3		2		1		0	Elderly
		3		2		1		0	All ages
		3		2		1		0	Other sp.
29	Do you keep a register of the community activities you carry out?
		1	Yes
		0	No
30	Do your health promotion activities include promoting the following
		Yes		No
		1		0	Eye conditions
		1		0	Vitamin A supplementation of pregnant women
		1		0	Exclusive breast feeding of infants (0-12 months)
		1		0	Vitamin A supplementation of young children
		1		0	Measles immunization
		1		0	Child nutrition
		1		0	Diabetes prevention
		1		0	Safe water
		1		0	Safe sanitation
		1		0	Household waste disposal
31	Experience of response to key health care messages by community
		Well		So-so		V poor		Not applic
		3		2		1		0	Vitamin A supplementation: pregnant women
		3		2		1		0	Exclusive breast feeding infants 0-12mn
		3		2		1		0	Vitamin A supplementation: young children
		3		2		1		0	Measles immunization
		3		2		1		0	Child nutrition
		3		2		1		0	Diabetes prevention
		3		2		1		0	Safe water
		3		2		1		0	Safe sanitation
		3		2		1		0	Household waste disposal
32	What has been your experience with creating demand for health care in the community?
		1	There is a lot of need in the community
		2	There is moderate need in the community
		3	It is important for a few people in the community
		4	The community does not need it.
		5	Other sp.
33	What do you usually do after identifying people in the community with health problems?
		1	Refer orally
		2	Refer with referral slip
		3	Accompany to health centre
		4	Other sp.
34	How well do you think patients comply with referral?							Do you make follow up home visits to encourage compliance?
		1	Good compliance
		2	Fair compliance						1	Yes
		3	Poor compliance						0	No
		4	Other sp.
35	Do you get feedback from the facility about referrals?
		0	Never
		1	Sometimes
		2	Always
		3	Other sp.
36	How often are you supervised by the JCHEW?
		1	Weekly
		2	Monthly
		3	Quartlerly
		4	Irregularly
		5	Never/very rare
37	What is the opinion of the supervision you receive?
		1	Very helpful
		2	Helpful
		3	A bit helpful
		4	Not helpful
		5	Not applicable - not supervised
38	The most challenging part of your health promotion activities. Choose the 2 most important.
		1st		2nd
		1		1	Poor supervision
		2		2	Lack of knowledge about health conditions
		3		3	Heavy workload
		4		4	No/Poor financial or non-financial incentives.
		5		5	Lack of needed needed supplies
		6		6	Transport around the community.
		7		7	Other sp.
	Now, I would like to ask you some questions on health promotion for eye health.
39	Where do patients with eye complaints go for treatment? (Tick all that apply)
		Yes		No
		1		0	Government Hospital
		1		0	Private Hospital
		1		0	Private Clinic
		1		0	PHC Centre
		1		0	PMV/ Community pharmacist
		1		0	Traditional healer
		1		0	Don’t know
		1		0	Other sp.
40	What has been your experience with health promotion for eye care?
		1	There is a lot of need in the community
		2	It is important for a some peope in the community
		3	I have no experience with it
		4	The community does not need it.
		5	Other sp.
41	How confident are you about identifying (not treating) eye problems
		1	Very confident
		2	A little confident
		3	Not confident at all
		4	I don’t know
		5	Other sp.
42	What is your perception about undergoing training for eye health promotion?
		1	Will welcome it and do the training
		2	Will welcome it but no time for training
		3	Health workers are already overburdened
		4	Other sp.
43	What kind of support will you need to carry out health promotion for eye health. Choose 2 most important.
		1st		2nd
		1		1	Support from the supervisor
		2		2	More knowledge in eye care from training
		3		3	Employ more staff to reduce the workload
		4		4	More financial or non-financial incentives
		5		5	Make sure our tool kit is well stocked with the needed supplies
		7		7	Provide transport for referred patients to access health centre.
		8		8	Other sp.
	Thank you for your time
																						Suspected reasons for poor compliance
																						Cost
																						Bureaucracy and Time wasting
																						Lack of Transportation
																						Lack of trust in the system
																						No experience of referrals
																						Other (Pls specify)
