# Supplementary material for: Assessing the capacity of primary health care facilities in Nigeria to deliver eye health promotion: Results of a mixed-methods feasibility study
Source: PLOS Glob Public Health. 2022 Nov 11;2(11):e0000645. doi: 10.1371/journal.pgph.0000645 (PMC10022001; doi:10.1371/journal.pgph.0000645)
Supplement: S4 Data — (XLSX) [file pgph.0000645.s004.xlsx]

## Sheet: Interview Facility Criteria
	Factor	Source	Measure	Score
1	Leadership and Governance
	Observed evidence of PHC Facilitysupervision in last 6 months	HoF Checklist	Yes/No	Yes=1; no=2
	Availability of SOPs in Facility	HoF Checklist	Yes/No	Yes=1; no=2
	Use of SOPs at least frequently	HoF Questionnaire	Yes/No	Yes=1; no=2
2	HReH
	Have requisite number of formally trained CHEWs (whether salaried or not)	HoF Checklist	Yes/No	Yes=1; no=2
	Have requisite number of active health workers (JCHEW)		Yes/No	Yes=1; no=2
3	Service Delivery
	Health Promotion in community 2x monthly	HP Questionnaire
	Health Promotion Facility (health talks) x4 monthly	JCHEW Questionnaire
	Number of patients attending all ages / 1000 population		data	highest
	Number of patients attending 50+ years / 1000 population		data	highest
	Blood glucose measurement		Yes/No	Yes=1; no=2
4	HMIS
	Any eye patients recorded	HoF Questionnaire	Yes/No	Yes=1; no=2
	Referral slips		Yes/No	Yes=1; no=2
5	Equipment/Infrastructure
	Space for counselling	HoF Checklist
	Space for VA measurement	HoF Checklist
	Observed inventory for medication	HoF Checklist
	Medication available for eye care		Yes/No	Yes=1; no=2
	Functioning refridgerators for cold chain for measles vaccine		Yes/No	Yes=1; no=2
	Functioning torches		Yes/No	Yes=1; no=2
	Selection of 9 Facilities
	PHC 1 "Top performing" and 1 "under- performing" from urban, semi urban and rural districts. Sub-total=6
	Health Posts 1 "top performing" from rural and semi urban districts and 1 "under-performing" from urban. Sub-total 3

## Sheet: Data to support selection 
				Criteria for selecting Facilities for Semi structured interviews and Village Health Worker Assesment
						Governance			HR		Service delivery								HMIS		Infratructure & Equipment
	Facility ID	District	Type of District	Name of facility	PHC/ Post	Supervision often	Have SOPs	Use SOPs often	Enough CHEWs	Enough JCHEWS	Catchment pop	Patients all ages	Rate all ages	>200=1, <200=0	Patients aged 50+years	Rate in patients aged 50+years	>20=1. <20=0	Glucose testing	Any eye patients	Referral slips	Eye medication	Fridge (working)	Torch (working)	Total score		Criteria
					PHC or HP	yes=1/ no=0	yes=1/ no=0	yes=1/ no=0	yes=1/ no=0	yes=1/ no=0								yes=1/ no=0	yes=1/ no=0	yes=1/ no=0	yes=1/ no=0	yes=1/ no=0	yes=1/ no=0
	PRIMARY HEALTH CENTRES
1	30	Redacted	Urban	Redacted	PHC	1	1	1	1	0	6444	4037	626.474	1	456	70.7635	1	1	0	1	0	1	0	9	Selected	Top performing urban PHC
2	6	Redacted	Semi urban	Redacted	PHC	1	0	0	1	0	24609	5036	204.641	1	1769	71.8843	1	1	1	1	0	1	0	8	Selected	Top performing semi urban PHC
3	13	Redacted	Semi urban	Redacted	PHC	1	1	0	0	0	6197	778	125.545	0	170	27.4326	1	1	1	1	0	0	1	7
4	25	Redacted	Urban	Redacted	PHC	1	0	0	0	0	3330	2087	626.727	1	112	33.6336	1	1	0	0	1	1	1	7
5	37	Redacted	Rural	Redacted	PHC	1	1	0	0	0	7500	1995	266	1	44	5.86667	0	1	0	0	1	1	1	7	Selected	Top performing rural PHC
6	1	Redacted	Semi urban	Redacted	PHC	1	1	0	0	0	3000	1384	461.333	1	69	23	1	1	0	1	0	0	0	6
7	11	Redacted	Semi urban	Redacted	PHC	1	0	1	0	0	10500	626	59.619	0	110	10.4762	0	1	1	1	0	1	0	6
8	14	Redacted	Semi urban	Redacted	PHC	1	1	0	0	0	3479	654	187.985	0	75	21.5579	1	1	0	1	0	1	0	6
9	20	Redacted	Urban	Redacted	PHC	1	1	1	0	0	11562	NA	NA	0	NA	NA	0	1	0	0	0	1	1	6
10	29	Redacted	Urban	Redacted	PHC	1	0	0	0	0	2960	1873	632.77	1	281	94.9324	1	1	0	0	1	1	0	6
11	32	Redacted	Urban	Redacted	PHC	1	1	1	0	0	7345	1914	260.585	1	54	7.35194	0	1	0	0	0	0	1	6
12	35	Redacted	Rural	Redacted	PHC	1	0	0	0	0	3746	830	221.57	1	52	13.8815	0	1	1	1	0	1	0	6
13	40	Redacted	Rural	Redacted	PHC	1	1	0	0	0	9895	1412	142.698	0	27	2.72865	0	1	0	1	1	0	1	6
14	12	Redacted	Semi urban	Redacted	PHC	1	1	0	0	0	7197	445	61.8313	0	125	17.3683	0	1	0	1	0	1	0	5
15	19	Redacted	Urban	Redacted	PHC	1	0	0	0	0	2451	1401	571.603	1	256	104.447	1	1	1	0	0	0	0	5
16	27	Redacted	Urban	Redacted	PHC	0	0	0	0	0	2051	2793	1361.77	1	96	46.8064	1	1	0	0	0	1	1	5
17	34	Redacted	Rural	Redacted	PHC	0	0	0	0	0	7200	2665	370.139	1	111	15.4167	0	1	1	1	1	0	0	5
18	28	Redacted	Urban	Redacted	PHC	1	0	0	0	0	12519	2544	203.211	1	NA	NA	0	1	0	0	0	0	1	4
19	31	Redacted	Urban	Redacted	PHC	1	1	0	0	0	7222	NA	NA	0	NA	NA	0	1	0	0	0	1	0	4
20	33	Redacted	Rural	Redacted	PHC	1	0	0	0	0	4852	1037	213.726	1	40	8.24402	0	0	0	1	1	0	0	4
21	36	Redacted	Rural	Redacted	PHC	0	1	0	0	0	5008	1419	283.347	1	26	5.19169	0	1	0	0	0	0	1	4
22	41	Redacted	Rural	Redacted	PHC	1	1	1	0	0	4808	1638	340.682	1	37	7.69551	0	0	0	0	0	0	0	4
23	43	Redacted	Rural	Redacted	PHC	1	0	0	0	0	13370	1606	120.12	0	NA	0	0	0	0	0	1	1	1	4
24	4	Redacted	Semi urban	Redacted	PHC	1	0	0	0	0	6617	845	127.701	0	39	5.89391	0	1	0	0	0	0	1	3
25	5	Redacted	Semi urban	Redacted	PHC	1	0	0	0	0	23190	7048	303.924	1	256	11.0392	0	1	0	0	0	0	0	3
26	9	Redacted	Semi urban	Redacted	PHC	1	0	0	0	0	9867	626	63.4438	0	110	11.1483	0	1	0	0	0	1	0	3
27	18	Redacted	Rural	Redacted	PHC	1	0	0	0	0	7024	1360	193.622	0	48	6.83371	0	0	1	0	0	1	0	3
28	7	Redacted	Semi urban	Redacted	PHC	0	0	0	0	0	10000	419	41.9	0	24	2.4	0	1	1	0	0	0	0	2	Selected	Under-performing semi urban PHC
29	10	Redacted	Semi urban	Redacted	PHC	1	0	0	0	0	16324	1747	107.02	0	135	8.27003	0	1	0	0	0	0	0	2
30	24	Redacted	Urban	Redacted	PHC	0	0	0	0	0	4782	3075	643.036	1	164	34.2953	1	0	0	0	0	0	0	2
31	26	Redacted	Urban	Redacted	PHC	1	0	0	0	0	7896	2884	365.248	1	84	10.6383	0	0	0	0	0	0	0	2	Selected	Under-performing urban PHC
32	42	Redacted	Rural	Redacted	PHC	1	0	0	0	0	14007	3579	255.515	1	87	6.21118	0	0	0	0	0	0	0	2
33	38	Redacted	Rural	Redacted	PHC	0	0	0	0	0	10208	1305	127.841	0	43	4.21238	0	0	0	0	0	1	0	1	Selected	Under-performing rural PHC
	HEALTH POSTS
1	2	Redacted	Semi urban	Redacted	HP	1	1	1	1	1	11185	277	24.7653	0	39	3.48681	0	1	1	0	0	1	1	9	Selected	Top performing semi urban HP
2	23	Redacted	Urban	Redacted	HP	0	0	0	1	1	1317	1752	1330.3	1	84	63.7813	1	1	1	0	0	0	0	6
3	48	Redacted	Rural	Redacted	HP	0	1	1	0	1	5025	1724	343.085	1	26	5.17413	0	1	0	0	0	0	1	6	Selected. Top rural HP	Top performing rural HP
4	15	Redacted	Semi urban	Redacted	HP	0	1	1	1	0	2115	545	257.683	1	103	48.6998	1	1	0	0	0	0	0	6
5	3	Redacted	Semi urban	Redacted	HP	1	1	0	1	1	8791	231	26.2769	0	29	3.29883	0	0	0	0	0	0	0	4
6	8	Redacted	Semi urban	Redacted	HP	0	0	0	1	0	6000	1237	206.167	1	62	10.3333	0	1	0	0	0	1	1	5
7	16	Redacted	Semi urban	Redacted	HP	1	0	0	1	1	NA	836	NA	NA	66	NA	0	1	0	0	0	0	0	4
8	22	Redacted	Urban	Redacted	HP	1	1	1	1	0	9047	NA	NA	NA	NA	NA	0	1	0	0	0	0	0	5
9	44	Redacted	Rural	Redacted	HP	1	0	0	1	1	5850	963	164.615	0	43	7.35043	0	0	1	0	0	0	0	4
10	45	Redacted	Rural	Redacted	HP	0	1	0	1	0	9253	2571	277.856	1	197	21.2904	1	1	0	0	0	0	0	5
11	17	Redacted	Semi urban	Redacted	HP	0	0	0	1	0	5754	433	75.252	0	141	24.5047	1	1	1	0	0	0	0	4
12	39	Redacted	Rural	Redacted	HP	1	0	0	0	0	22500	NA	NA	0	NA	NA	0	0	1	0	0	1	0	3
13	46	Redacted	Rural	Redacted	HP	0	1	1	0	1	14004	2346	167.524	0	26	1.85661	0	0	0	0	0	0	0	3
14	47	Redacted	Rural	Redacted	HP	0	0	0	1	0	5233	1262	241.162	1	26	4.96847	0	0	0	0	0	1	0	3
15	21	Redacted	Urban	Redacted	HP	0	0	0	1	0	3847	1309	340.265	1	NA	NA	NA	0	0	0	0	0	0	2	Selected	Under-performing urban HP
					Rates = persons visiting facility/1000 population
					Names of Facilities and their districts have been redacted to maintain anonymity
					SOP=Standard Operating Proceedures? Standing Order/ Practice Guidelines
					(J)CHEW= (Junior) Community Health Extension Worker
